# Supplementary material for: Incidence of Stress-Induced Hyperglycemia in Acute Ischemic Stroke: A Systematic Review and Meta-Analysis
Source: MDPI journal article supplement (doi:10.3390/brainsci13040556), 2023-03-26
Supplement: s1 [file s1]

## PubMed Search History

| Search number | Query                                                                                                                                                                                                                                                                                                                                                                                                                                                                                                                                                                                                                  | Sort By     | Filters | Search Details                                                                                                                                                                                                                                                                                                                                                                                                                                                                                                                                                                                         | Results | Time     |
|---------------|------------------------------------------------------------------------------------------------------------------------------------------------------------------------------------------------------------------------------------------------------------------------------------------------------------------------------------------------------------------------------------------------------------------------------------------------------------------------------------------------------------------------------------------------------------------------------------------------------------------------|-------------|---------|--------------------------------------------------------------------------------------------------------------------------------------------------------------------------------------------------------------------------------------------------------------------------------------------------------------------------------------------------------------------------------------------------------------------------------------------------------------------------------------------------------------------------------------------------------------------------------------------------------|---------|----------|
| 7             | ((("Ischemic Stroke"[Mesh]) OR<br>((((((((Ischemic Stroke[Title/Abstract])<br>OR (Ischemic Strokes[Title/Abstract]))<br>OR (Stroke, Ischemic[Title/Abstract]))<br>OR (Ischaemic Stroke[Title/Abstract]))<br>OR (Ischaemic Strokes[Title/Abstract]))<br>OR (Stroke, Ischaemic[Title/Abstract]))<br>OR (Acute Ischemic<br>Stroke[Title/Abstract])) OR (Acute<br>Ischemic Strokes[Title/Abstract])) OR<br>(Ischemic Stroke,<br>Acute[Title/Abstract])) OR (Stroke,<br>Acute Ischemic[Title/Abstract]))) AND<br>(("Hyperglycemia"[Mesh]) OR<br>(((Hyperglycemia[Title/Abstract])) OR<br>(Hyperglycemias[Title/Abstract]))) |             |         | ("Ischemic Stroke"[MeSH Terms] OR<br>("Ischemic Stroke"[Title/Abstract] OR<br>"ischemic strokes"[Title/Abstract] OR<br>"stroke ischemic"[Title/Abstract] OR<br>"ischaemic stroke"[Title/Abstract] OR<br>"ischaemic strokes"[Title/Abstract] OR<br>"stroke ischaemic"[Title/Abstract] OR<br>"acute ischemic stroke"[Title/Abstract]<br>OR "acute ischemic<br>strokes"[Title/Abstract] OR "ischemic<br>stroke acute"[Title/Abstract] OR "stroke<br>acute ischemic"[Title/Abstract])) AND<br>("Hyperglycemia"[MeSH Terms] OR<br>("Hyperglycemia"[Title/Abstract] OR<br>"Hyperglycemias"[Title/Abstract])) | 609     | 09:26:30 |
| 6             | ("Hyperglycemia"[Mesh]) OR<br>(((Hyperglycemia[Title/Abstract])) OR<br>(Hyperglycemias[Title/Abstract]))                                                                                                                                                                                                                                                                                                                                                                                                                                                                                                               |             |         | "Hyperglycemia"[MeSH Terms] OR<br>"Hyperglycemia"[Title/Abstract] OR<br>"Hyperglycemias"[Title/Abstract]                                                                                                                                                                                                                                                                                                                                                                                                                                                                                               | 73,832  | 09:25:57 |
| 5             | ("Ischemic Stroke"[Mesh]) OR<br>((((((((Ischemic Stroke[Title/Abstract])<br>OR (Ischemic Strokes[Title/Abstract]))<br>OR (Stroke, Ischemic[Title/Abstract]))<br>OR (Ischaemic Stroke[Title/Abstract]))<br>OR (Ischaemic Strokes[Title/Abstract]))<br>OR (Stroke, Ischaemic[Title/Abstract]))<br>OR (Acute Ischemic<br>Stroke[Title/Abstract])) OR (Acute<br>Ischemic Strokes[Title/Abstract])) OR<br>(Ischemic Stroke,<br>Acute[Title/Abstract])) OR (Stroke,<br>Acute Ischemic[Title/Abstract]))                                                                                                                      |             |         | "Ischemic Stroke"[MeSH Terms] OR<br>"Ischemic Stroke"[Title/Abstract] OR<br>"ischemic strokes"[Title/Abstract] OR<br>"stroke ischemic"[Title/Abstract] OR<br>"ischaemic stroke"[Title/Abstract] OR<br>"ischaemic strokes"[Title/Abstract] OR<br>"stroke ischaemic"[Title/Abstract] OR<br>"acute ischemic stroke"[Title/Abstract]<br>OR "acute ischemic<br>strokes"[Title/Abstract] OR "ischemic<br>stroke acute"[Title/Abstract] OR "stroke<br>acute ischemic"[Title/Abstract]                                                                                                                         | 69,002  | 09:25:39 |
| 4             | ((Hyperglycemia[Title/Abstract])) OR<br>(Hyperglycemias[Title/Abstract])                                                                                                                                                                                                                                                                                                                                                                                                                                                                                                                                               |             |         | "Hyperglycemia"[Title/Abstract] OR<br>"Hyperglycemias"[Title/Abstract]                                                                                                                                                                                                                                                                                                                                                                                                                                                                                                                                 | 50,567  | 09:24:33 |
| 3             | "Hyperglycemia"[Mesh]                                                                                                                                                                                                                                                                                                                                                                                                                                                                                                                                                                                                  | Most Recent |         | "Hyperglycemia"[MeSH Terms]                                                                                                                                                                                                                                                                                                                                                                                                                                                                                                                                                                            | 39,720  | 09:22:36 |
| 2             | ((((((((Ischemic Stroke[Title/Abstract])<br>OR (Ischemic Strokes[Title/Abstract]))                                                                                                                                                                                                                                                                                                                                                                                                                                                                                                                                     |             |         | "ischemic stroke"[Title/Abstract] OR<br>"ischemic strokes"[Title/Abstract] OR                                                                                                                                                                                                                                                                                                                                                                                                                                                                                                                          | 67,897  | 09:19:20 |

|   |                                                                                                                                                                                                                                                                                                                                                                             |                |  |                                                                                                                                                                                                                                                                                                                                                           |       |          |
|---|-----------------------------------------------------------------------------------------------------------------------------------------------------------------------------------------------------------------------------------------------------------------------------------------------------------------------------------------------------------------------------|----------------|--|-----------------------------------------------------------------------------------------------------------------------------------------------------------------------------------------------------------------------------------------------------------------------------------------------------------------------------------------------------------|-------|----------|
|   | OR (Stroke, Ischemic[Title/Abstract]))<br>OR (Ischaemic Stroke[Title/Abstract]))<br>OR (Ischaemic Strokes[Title/Abstract]))<br>OR (Stroke, Ischaemic[Title/Abstract]))<br>OR (Acute Ischemic<br>Stroke[Title/Abstract])) OR (Acute<br>Ischemic Strokes[Title/Abstract])) OR<br>(Ischemic Stroke,<br>Acute[Title/Abstract])) OR (Stroke,<br>Acute Ischemic[Title/Abstract])) |                |  | "stroke ischemic"[Title/Abstract] OR<br>"ischaemic stroke"[Title/Abstract] OR<br>"ischaemic strokes"[Title/Abstract] OR<br>"stroke ischaemic"[Title/Abstract] OR<br>"acute ischemic stroke"[Title/Abstract]<br>OR "acute ischemic<br>strokes"[Title/Abstract] OR "ischemic<br>stroke acute"[Title/Abstract] OR "stroke<br>acute ischemic"[Title/Abstract] |       |          |
| 1 | "Ischemic Stroke"[Mesh]                                                                                                                                                                                                                                                                                                                                                     | Most<br>Recent |  | "Ischemic Stroke"[MeSH Terms]                                                                                                                                                                                                                                                                                                                             | 7,129 | 09:16:36 |

### Embase Search History

| No. | Query                                                                                                                                                                                                                                                                                                              | Results | Date           |
|-----|--------------------------------------------------------------------------------------------------------------------------------------------------------------------------------------------------------------------------------------------------------------------------------------------------------------------|---------|----------------|
| #7  | #3 AND #6                                                                                                                                                                                                                                                                                                          | 1270    | 20 Jul<br>2022 |
| #6  | #4 OR #5                                                                                                                                                                                                                                                                                                           | 132814  | 20 Jul<br>2022 |
| #5  | 'hyperglycemia':ab,ti OR 'hyperglycemias':ab,ti                                                                                                                                                                                                                                                                    | 73253   | 20 Jul<br>2022 |
| #4  | 'hyperglycemia'/exp                                                                                                                                                                                                                                                                                                | 112199  | 20 Jul<br>2022 |
| #3  | #1 OR #2                                                                                                                                                                                                                                                                                                           | 115367  | 20 Jul<br>2022 |
| #2  | 'ischemic stroke':ab,ti OR 'ischemic strokes':ab,ti OR 'stroke, ischemic':ab,ti OR 'ischaemic stroke':ab,ti OR<br>'ischaemic strokes':ab,ti OR 'stroke, ischaemic':ab,ti OR 'acute ischemic stroke':ab,ti OR 'acute ischemic<br>strokes':ab,ti OR 'ischemic stroke, acute':ab,ti OR 'stroke, acute ischemic':ab,ti | 112384  | 20 Jul<br>2022 |
| #1  | 'ischemic stroke'/exp                                                                                                                                                                                                                                                                                              | 15456   | 20 Jul<br>2022 |

### Cochrane Library Search History

Search Name:CochraneLibrarySearchHistory

Date Run: 20/07/2022 16:00:02

Comment:

ID Search Hits

#1 MeSH descriptor: [Hyperglycemia] explode all trees3243

- #2 (Hyperglycemia):ti,ab,kw OR (Hyperglycemias):ti,ab,kw 8534
- #3 MeSH descriptor: [Ischemic Stroke] explode all trees 365
- #4 (Ischemic Stroke):ti,ab,kw OR (Ischemic Strokes):ti,ab,kw OR (Stroke, Ischemic):ti,ab,kw OR (Ischaemic Stroke):ti,ab,kw OR (Ischaemic Strokes):ti,ab,kw 16947
- #5 (Stroke, Ischaemic):ti,ab,kw OR (Acute Ischemic Stroke):ti,ab,kw OR (Acute Ischemic Strokes):ti,ab,kw OR (Ischemic Stroke, Acute):ti,ab,kw OR (Stroke, Acute Ischemic):ti,ab,kw 16847
- #6 #1 OR #2 9662
- #7 #3 OR #4 OR #5 16980
- #8 #6 AND #7 135

Web of Science Search History

🕒 Session Queries

Build a new query based on your searches in this session.

0/3

Combine Sets

Clear History

3

#2 AND #1

2,236

Add to query

🔗

✎

🔔

2

(TS=(Hyperglycemia)) OR TS=(Hyperglycemias)

121,307

Add to query

🔗

✎

🔔

1

(((((TS=(Ischemic Stroke)) OR TS=(Ischemic Strokes)) OR TS=(Stroke, Ischemic)) OR TS=(Ischaemic Stroke)) OR TS=(Ischaemic Strokes)) OR TS=(Stroke, Ischaemic)) OR TS=(Acute Ischemic Stroke) OR TS=(Acute Ischemic Strokes) OR TS=(Ischemic Stroke, Acute)) OR TS=(Stroke, Acute Ischemic)

181,433

Add to query

🔗

✎

🔔
